# Supplementary material
Source: PubMed Central journal article supplement (PMC2577037)
Supplement: NIHMS72409-supplement-Suppl_Info.pdf [file NIHMS72409-supplement-Suppl_Info.pdf]

## **Supplementary Information.**

### **Secondary mutations as a mechanism of cisplatin resistance in *BRCA2*-mutated cancers**

Wataru Sakai, Elizabeth M. Swisher, Beth Y. Karlan, Mukesh K. Agarwal, Jake Higgins, Cynthia Friedman, Emily Villegas, Céline Jacquemont, Daniel J. Farrugia, Fergus J. Couch, Nicole Urban, Toshiyasu Taniguchi

#### **Table of Contents**

**1. Supplemental Figures (1-9)**

**2. Supplemental Tables (1-5)**

## 1. Supplemental Figures.

Sakai et al., Supplemental Figure1

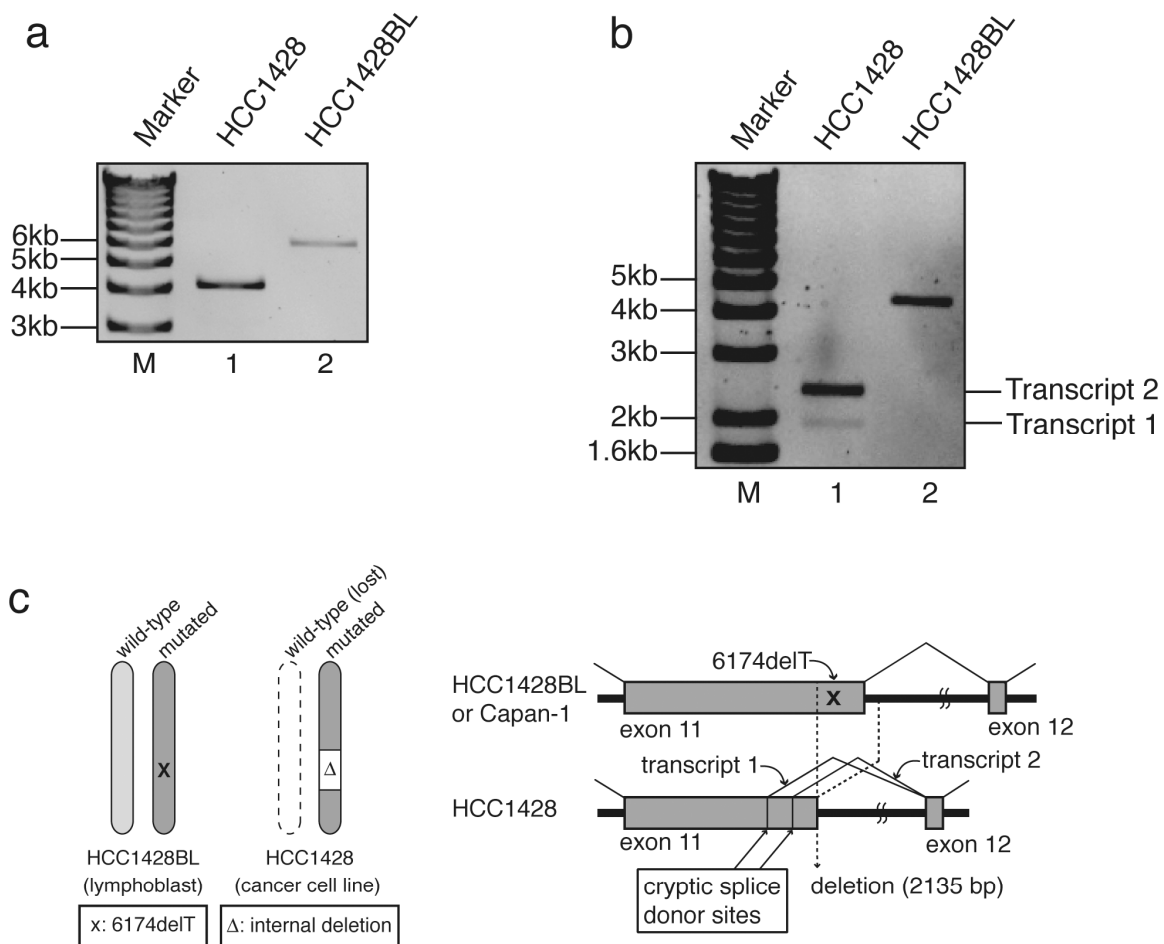

**Figure S1. *BRCA2* of HCC1428BL lymphoblast line and HCC1428 breast cancer cell line.** **a**, Ethidium bromide-stained agarose gel electrophoresis of the genomic PCR products from HCC1428 and HCC1428BL. The primers, B2F3785 and B2R6932, were used for the amplification. The molecular weight size standard is a 1000-bp ladder. A smaller PCR product was detected in HCC1428. **b**, Ethidium bromide-stained agarose gel electrophoresis of the RT-PCR products from HCC1428 and HCC1428BL. The primers, B2F3785 and B2R8452, were used for the amplification. The molecular weight size standard is a 1000-bp ladder. Two smaller RT-PCR products (transcripts 1 and 2) were detected in HCC1428. **c**, Schematic presentation of *BRCA2* alleles. HCC1428BL had wild-type and mutant (6174delT) alleles. HCC1428 lost the wild-type allele and retained the mutant allele with an additional internal deletion. The HCC1428's mutant allele had a 2135-bp deletion, which activates two cryptic splice donor sites in exon 11, resulting in the expression of transcripts 1 and 2.

Sakai et al., Supplemental Figure 2

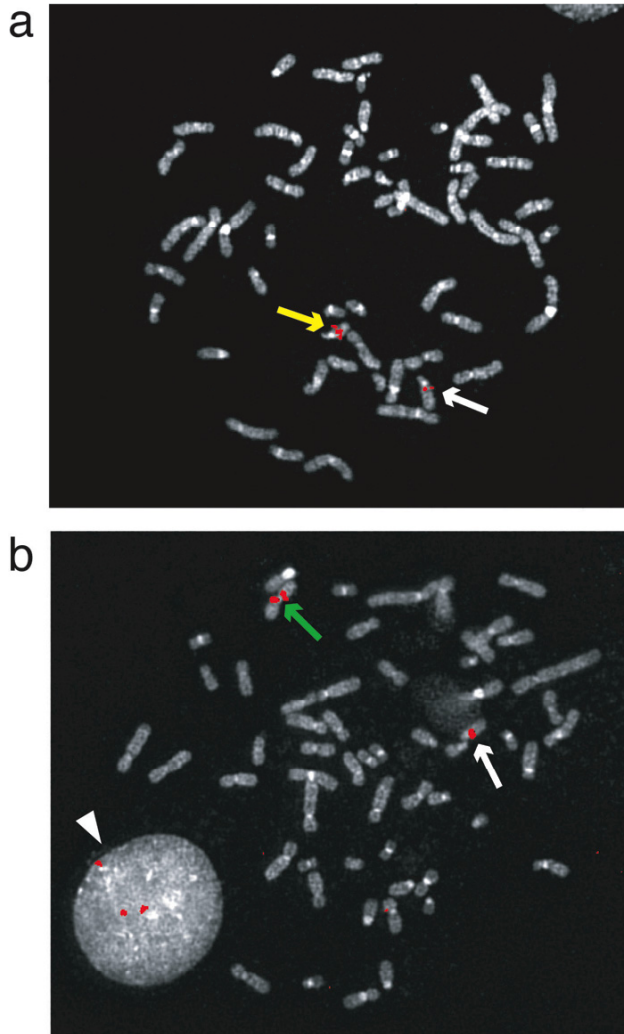

**Figure S2. Multiple copies of *BRCA2* gene in Capan-1.** Representative pictures of BRCA2 FISH on metaphase chromosomes of Capan-1 cells. **a**, This cell has a short chromosome 13 (yellow arrow) and a normal-looking chromosome 13 (white arrow), both of which have one BRCA2 signal (red). Therefore, the cell has at least 2 copies of *BRCA2* gene. **b**, This cell has a normal-looking chromosome 13 (white arrow) with one BRCA2 signal (red) and an isochromosome 13 (green arrow) with two *BRCA2* signals (red). Therefore, the cell has at least 3 copies of *BRCA2* gene. An interphase nucleus (white arrow head) also shows three BRCA2 signals (red).

Sakai, et al. Supplemental Figure. 3

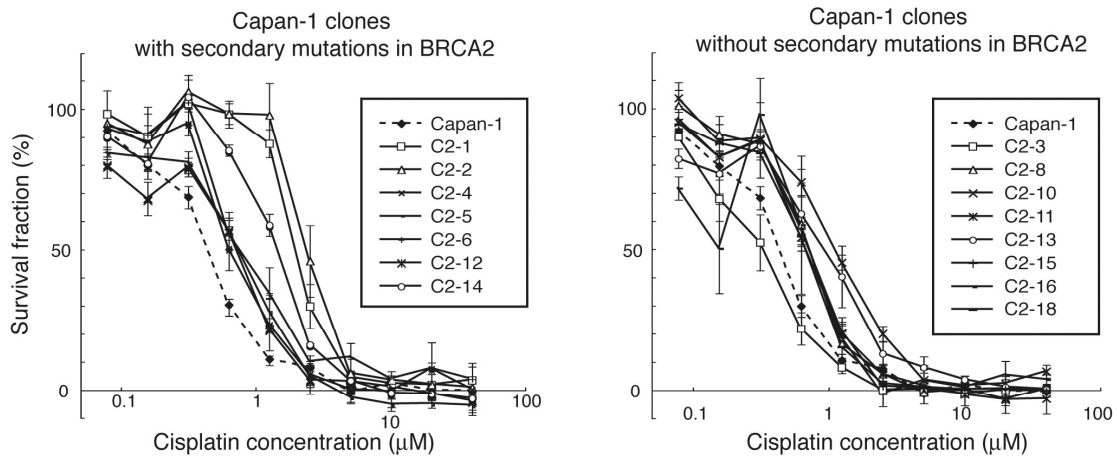

**Figure S3. Cisplatin-selected clones of a pancreatic cancer cell line, Capan-1.** Fifteen subclones of Capan-1 were generated by selecting the cells in the presence of cisplatin. Fourteen clones (except C2-3) were resistant to cisplatin compared to the parental Capan-1 cells. The cells were treated with cisplatin at the indicated concentrations for 10 days, and survival fraction was measured by crystal violet assay. Mean values of at least three independent experiments  $\pm$  SEM are shown.

Sakai et al., Supplemental Figure 4

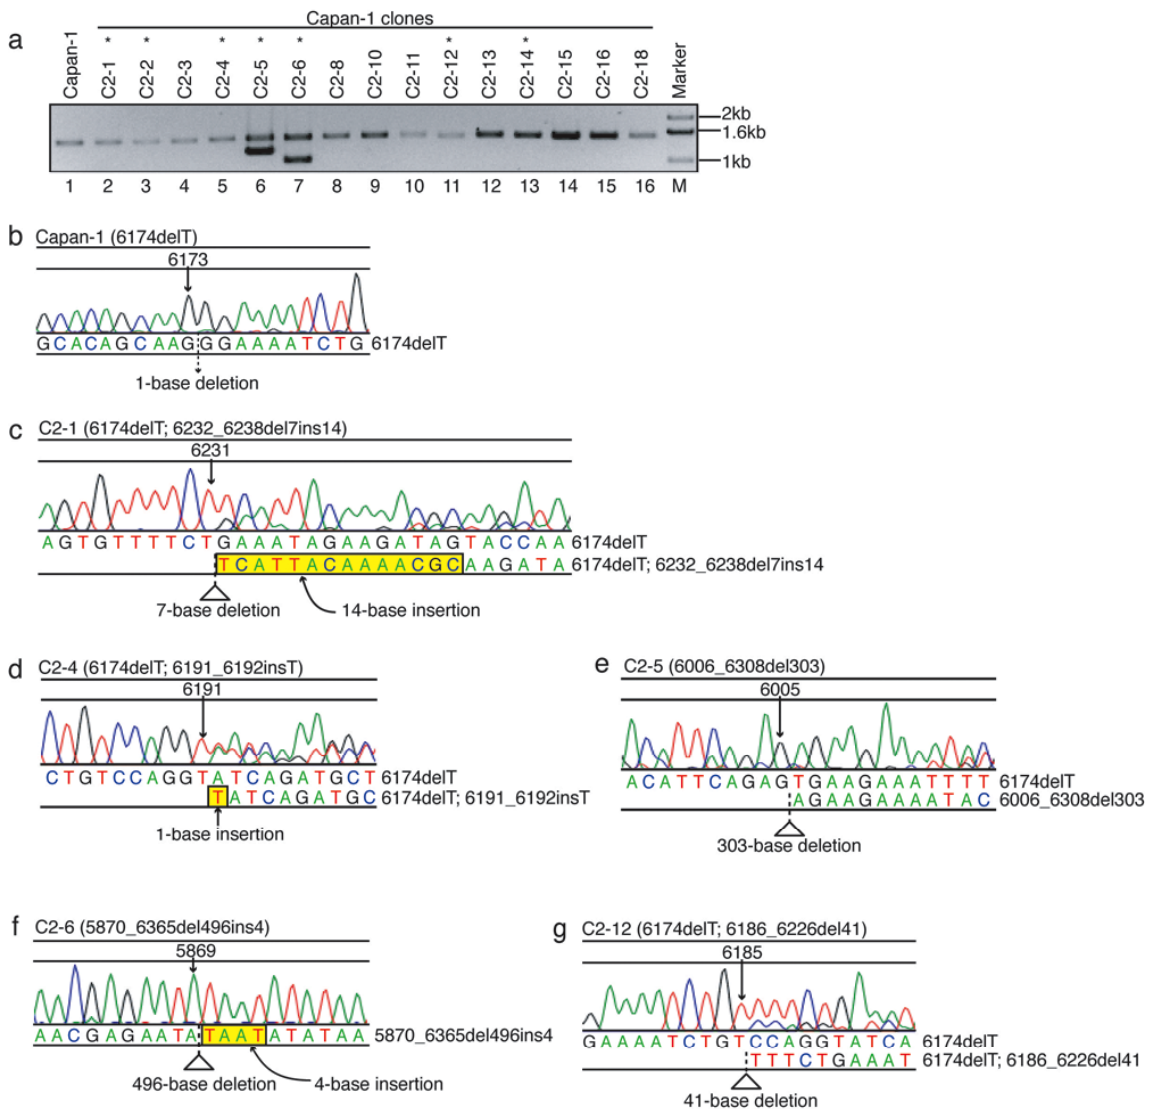

**Figure S4. *BRCA2* sequences of transcripts in Capan-1 clones.** **a**, Ethidium bromide-stained agarose gel electrophoresis of the RT-PCR products from Capan-1 and its clones. The primers, B2F5391 and B2R6932, were used for the amplification. The molecular weight size standard is a 1000-bp ladder. Asterisk (\*) indicates clones with restored *BRCA2* protein expression. In C2-5 and C2-6, smaller RT-PCR products, in addition to normal size products, were detected. **b**, Sequence of *BRCA2* transcript in parental Capan-1 cells. A *BRCA2* mutation (6174delT) was detected. **c**, *BRCA2* sequence in clone C2-1. Mixed sequences of the original sequence (6174delT) and the sequence with an additional mutation (6174delT; 6232\_6238del7ins14) were detected. C2-2 showed the same pattern (data not shown). **d**, C2-4. Mixed sequences of the original sequence (6174delT) and the sequence with an additional mutation (6174delT; 6191\_6192insT) were detected. C2-14 showed the same pattern (data not shown). **e**, C2-5. Mixed sequences of the original sequence (6174delT) and the sequence with an additional mutation (6006\_6308del303) were detected. The signals derived from the original sequence were much weaker than those from 6006\_6308del303 sequence,

consistent with the ratio of intensities of 1.6kb (the original sequence, weak) and 1.3kb (6006\_6308del303, strong) bands in lane 6 of Fig S4A. **f**, C2-6. The two RT-PCR products shown in Fig. S4A lane 7 were purified from the gel, and sequenced separately. In the smaller RT-PCR product (1.1kb), the sequence with an additional mutation (5870\_6365del496ins4) was detected. In the normal size product (1.6kb), the original sequence (6174delT) was detected (data not shown). **g**, C2-12. Mixed sequences of the original sequence (6174delT) and the sequence with an additional mutation (6174delT; 6186\_6226del41) were detected. All of these mutations were confirmed in genomic DNA as shown in Fig S5.

Sakai et al., Supplemental Figure 5

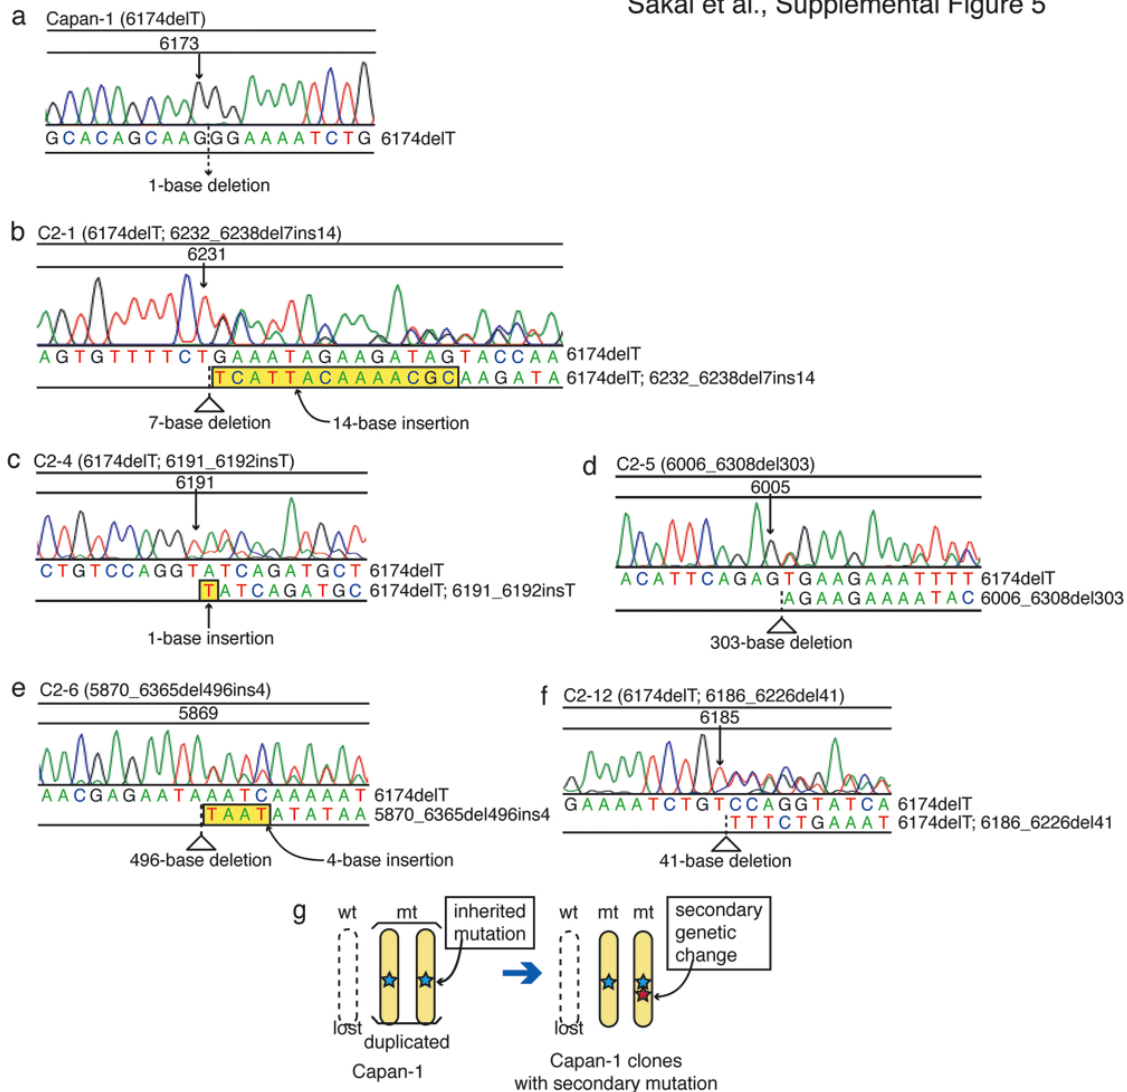

**Figure S5. BRCA2 sequences of genomic DNAs from Capan-1 clones.**

**a**, Parental Capan-1 cells. A *BRCA2* mutation (6174delT) was detected. **b**, C2-1. Mixed sequences of the original sequence (6174delT) and the sequence with an additional mutation (6174delT; 6232\_6238del7ins14) were detected. C2-2 showed the same pattern (data not shown). **c**, C2-4. Mixed sequences of the original sequence (6174delT) and the sequence with an additional mutation (6174delT; 6191\_6192insT) were detected.

C2-14 showed the same pattern (data not shown). **d**, C2-5. Mixed sequences of the original sequence (6174delT) and the sequence with an additional mutation (6006\_6308del303) were detected. **e**, C2-6. Mixed sequences of the original sequence (6174delT) and the sequence with an additional mutation (5870\_6365del496ins4) were detected. **f**, C2-12. Mixed sequences of the original sequence (6174delT) and the sequence with an additional mutation (6174delT; 6186\_6226del41) were detected. **g**, Schematic model of the secondary mutations in Capan-1 clones. Capan-1 has lost a wild-type *BRCA2* allele, but has retained an allele with the inherited mutation (6174delT). This mutant allele has been duplicated (or triplicated), according to the FISH data shown in Fig. S2. In Capan-1 clones with secondary mutations, the secondary genetic change occurs only on one of the mutant *BRCA2* copies. This model explains why we see mixed sequences of *BRCA2* in all of the Capan-1 clones with secondary *BRCA2* mutations.

Sakai, et al. Supplementary Figure. 6

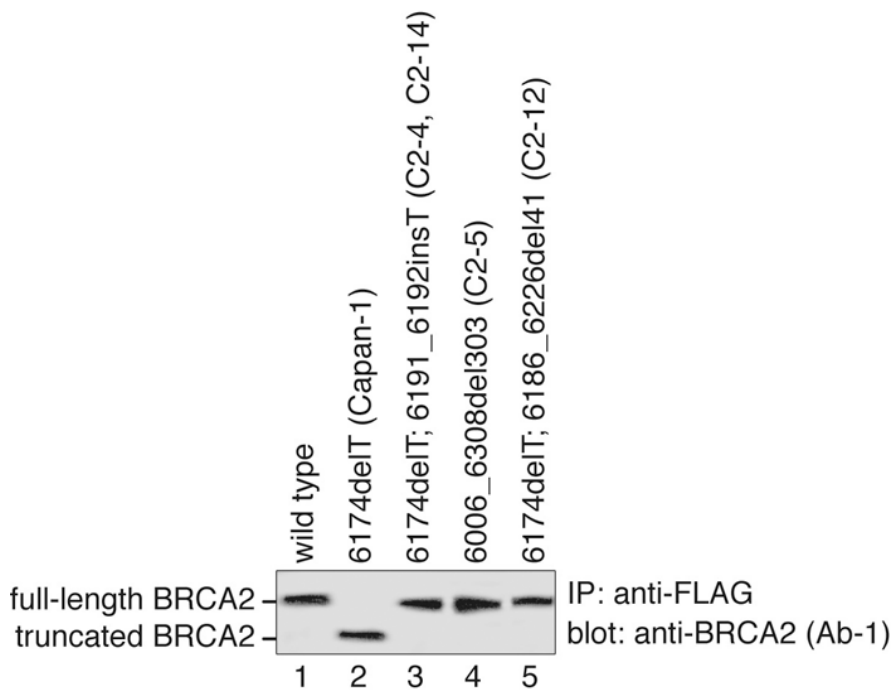

**Figure S6. Expression of FLAG-BRCA2 mutant proteins used for the DR-GFP homologous recombination assay.** FLAG-tagged BRCA2 variants used for the DR-GFP homologous recombination assay shown in Fig 3b were transiently expressed in 293T cells, immunoprecipitated with anti-FLAG (M2) (Sigma), and analyzed by Western blotting using a BRCA2 antibody (Ab-1, EMD Biosciences).

Sakai et al., Supplemental Figure 7

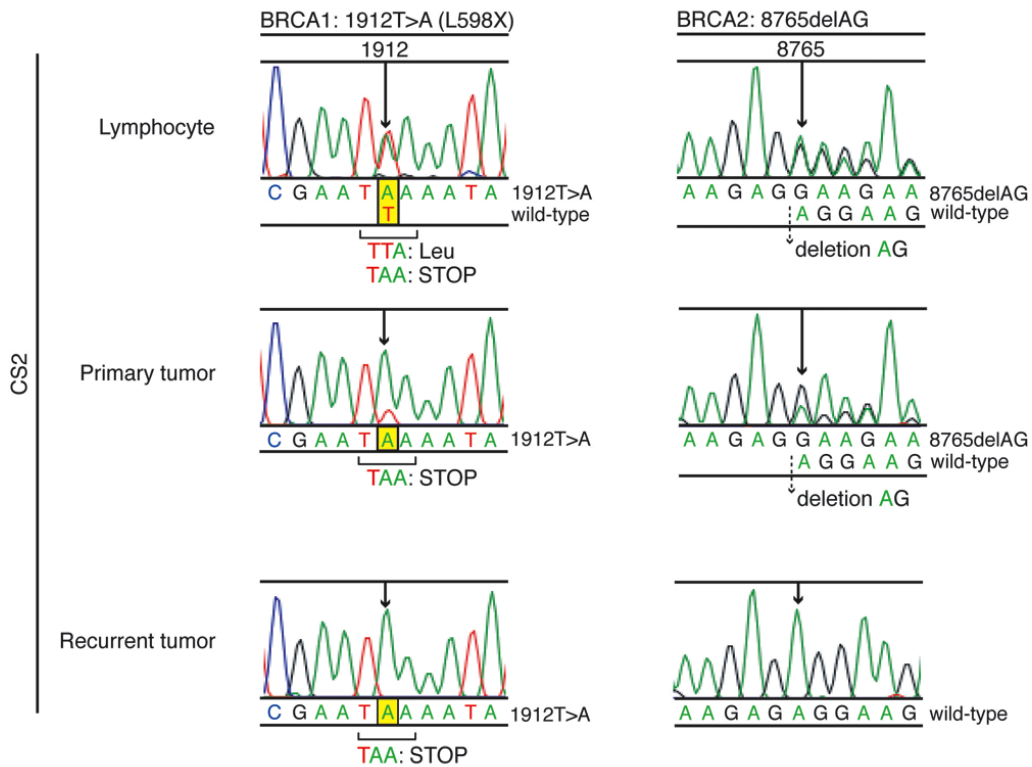

**Figure S7. DNA sequences of *BRCA1* and *BRCA2* in peripheral blood lymphocytes, and pre-treatment and recurrent tumors from a patient (CS2) with *BRCA1-*BRCA2**-doubly mutated ovarian cancer.** The lymphocytes showed heterozygous mutations of both *BRCA1* (1912T>A) and *BRCA2* (8765\_8766delAG). Before treatment, the primary tumor showed LOH of *BRCA1* (loss of wild-type *BRCA1*), and heterozygosity of *BRCA2*. The post-treatment recurrent tumor showed LOH of *BRCA1* (loss of wild-type *BRCA1*) and LOH of *BRCA2* (loss of mutant *BRCA2*).

Sakai, et al. Supplementary Figure. 8

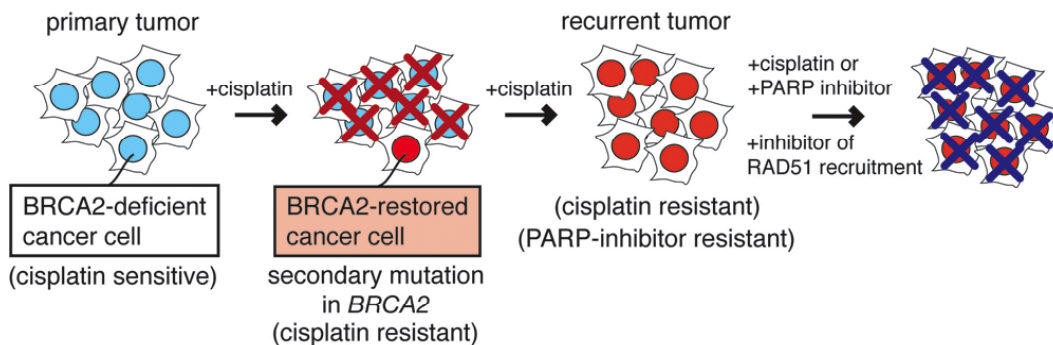

**Figure S8. Schematic model for involvement of a secondary *BRCA2* mutation in development of resistance to cisplatin in a *BRCA2*-mutated tumor.** See text for detail.



Sakai, et al. Supplemental Figure. 9

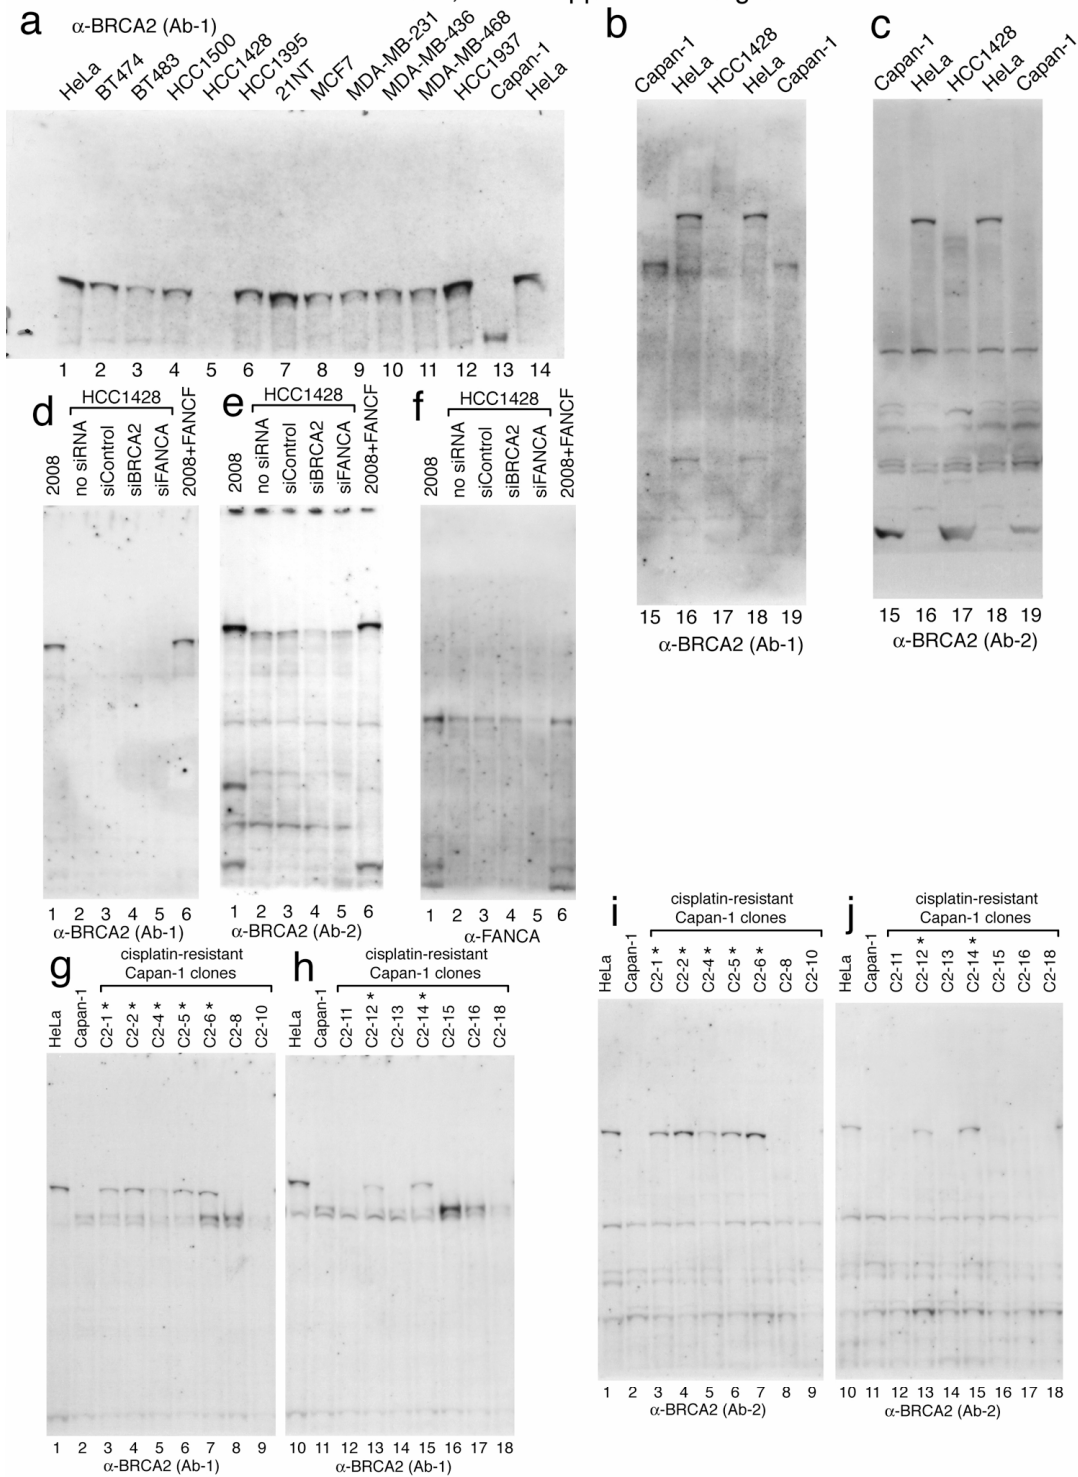

**Figure S9. Non-cropped pictures of blots.**

**(a, b, c)** Non-cropped pictures of blots presented in Figure 1a.

**(d, e, f)** Non-cropped pictures of blots presented in Figure 1f.

**(g, h, i, j)** Non-cropped pictures of blots presented in Figure 2a.

## 2. Supplemental Tables

**Table S1. Summary of characterization of cisplatin-selected Capan-1 clones.** *BRCA2* sequence, BRCA2 protein expression, and cisplatin sensitivity of Capan-1 and its clones are summarized.

Table S1. Characterization of cisplatin-selected Capan-1 clones.

| Name of clone | originated from | BRCA2 mutation |                     | Type of secondary mutation           | BRCA2 protein expression | Cisplatin sensitivity |            |
|---------------|-----------------|----------------|---------------------|--------------------------------------|--------------------------|-----------------------|------------|
|               |                 | inherited      | additional          |                                      |                          | IC50 (mean±SEM)       | ( $\mu$ M) |
| C2-1          | plate #1        | 6174delT       | 6232_6238del7ins14  | second site deletion and insertion   | +                        | R                     | 2.09±0.15  |
| C2-2          | plate #1        | 6174delT       | 6232_6238del7ins14  | second site deletion and insertion   | +                        | R                     | 2.49±0.39  |
| C2-3          | plate #2        | 6174delT       | not found           | N/A                                  | -                        | S                     | 0.34±0.08  |
| C2-4          | plate #3        | 6174delT       | 6191_6192insT       | second site insertion                | +                        | R                     | 0.73±0.16  |
| C2-5          | plate #3        | 6174delT       | 6006_6308del303     | in-frame deletion surrounding nt6174 | +                        | R                     | 0.72±0.08  |
| C2-6          | plate #3        | 6174delT       | 5870_6365del496ins4 | in-frame deletion surrounding nt6174 | +                        | R                     | 0.86±0.15  |
| C2-8          | plate #4        | 6174delT       | not found           | N/A                                  | -                        | R                     | 0.75±0.12  |
| C2-10         | plate #5        | 6174delT       | not found           | N/A                                  | -                        | R                     | 1.16±0.06  |
| C2-11         | plate #6        | 6174delT       | not found           | N/A                                  | -                        | R                     | 0.69±0.05  |
| C2-12         | plate #7        | 6174delT       | 6186_6226del41      | second site deletion                 | +                        | R                     | 0.71±0.08  |
| C2-13         | plate #8        | 6174delT       | not found           | N/A                                  | -                        | R                     | 1.07±0.28  |
| C2-14         | plate #9        | 6174delT       | 6191_6192insT       | second site insertion                | +                        | R                     | 1.48±0.10  |
| C2-15         | plate #10       | 6174delT       | not found           | N/A                                  | -                        | R                     | 0.74±0.07  |
| C2-16         | plate #11       | 6174delT       | not found           | N/A                                  | -                        | R                     | 0.73±0.18  |
| C2-18         | plate #12       | 6174delT       | not found           | N/A                                  | -                        | R                     | 0.71±0.07  |
| Capan-1       | N/A             | 6174delT       | N/A                 | N/A                                  | -                        | S                     | 0.46±0.03  |

abbreviations: N/A; not applicable,

ND; not done, R; resistant, S;

sensitive

**Table S2. Evaluation of homology-directed repair of the FLAG-BRCA2 mutants.**

|                                                                                                                                                  | Vector       | Wild-type    | 6174delT     | C2-4,<br>C2-14 | C2-5         | C2-12        |
|--------------------------------------------------------------------------------------------------------------------------------------------------|--------------|--------------|--------------|----------------|--------------|--------------|
| Mean GFP positive cells<br>± SEM                                                                                                                 | 214<br>± 8   | 1073<br>± 69 | 316<br>± 9   | 1114<br>± 39   | 1771<br>± 25 | 1540<br>± 27 |
| Relative transfection<br>efficiency (compared to<br>wild-type BRCA2 construct)<br>determined by<br>immunofluorescence with<br>anti-FLAG antibody | ~            | 1.0          | 1.1          | 0.7            | 0.9          | 1.3          |
| Normalized<br>GFP positive cells                                                                                                                 | ~            | 1073         | 297          | 1620           | 2024         | 1173         |
| Fold induction<br>relative to vector<br>± SEM                                                                                                    | 1.0<br>± 0.1 | 5.0<br>± 0.3 | 1.4<br>± 0.1 | 7.6<br>± 0.3   | 9.5<br>± 0.1 | 5.5<br>± 0.1 |

Raw data of Figure 3b.

**Table S3. Summary of genetic changes in clinical specimens of recurrent BRCA2-mutated ovarian cancer treated with platinum.**

Table S3. Summary of genetic changes in clinical specimens of recurrent BRCA2-mutated ovarian cancer treated with platinum

| Patient                                    | specimen      | Clinical platinum response<br>at the time of sampling | Mutated<br>gene | Inherited mutation | LOH                                                | Secondary           |
|--------------------------------------------|---------------|-------------------------------------------------------|-----------------|--------------------|----------------------------------------------------|---------------------|
|                                            |               |                                                       |                 |                    |                                                    | genetic change      |
| <i>Paired specimens</i>                    |               |                                                       |                 |                    |                                                    |                     |
| CS9                                        | pre-platinum  | sensitive                                             | <i>BRCA2</i>    | 6174delT           | Yes (loss of WT)                                   | No                  |
|                                            | post-platinum | sensitive                                             | <i>BRCA2</i>    | 6174delT           | Yes (loss of WT)                                   | No                  |
| CS15                                       | pre-platinum  | sensitive                                             | <i>BRCA2</i>    | 2699delT           | Yes (loss of WT)                                   | No                  |
|                                            | post-platinum | sensitive                                             | <i>BRCA2</i>    | 2699delT           | Yes (loss of WT)                                   | No                  |
| CS2                                        | pre-platinum  | sensitive                                             | <i>BRCA1</i>    | 1912T>A (L598X)    | Yes(loss of WT)                                    | No                  |
|                                            |               |                                                       | <i>BRCA2</i>    | 8765_8766delAG     | No                                                 | No                  |
|                                            | post-platinum | refractory                                            | <i>BRCA1</i>    | 1912T>A (L598X)    | Yes (loss of WT)                                   | No                  |
|                                            |               |                                                       | <i>BRCA2</i>    | 8765_8766delAG     | Yes (loss of mt)                                   | Yes (loss of mt)    |
| <i>Non-paired post-treatment specimens</i> |               |                                                       |                 |                    |                                                    |                     |
| UW174                                      | post-platinum | refractory                                            | <i>BRCA2</i>    | 5578_5579delAA     | Yes (loss of WT)                                   | No                  |
| UW3548                                     | post-platinum | refractory                                            | <i>BRCA2</i>    | 6174delT           | Yes (LOH of SNPs)<br>gain of wild-type<br>sequence | Yes (back mutation) |

abbreviations: LOH; loss of heterozygosity, mt: mutant allele, SNP; single nucleotide polymorphism, WT; wild-type allele

**Table S4. Primers used for *BRC42* sequencing and PCR.**

| #  | Primer  | Seq 5' to 3'             |
|----|---------|--------------------------|
| 1  | B2Pro1F | TCCGAATCCTAAGAATGCAAA    |
| 2  | B2Pro1R | GCGAGGGCTTGGTAGTATCT     |
| 3  | B2Pro2F | CACCCAGGCCTGACTTCC       |
| 4  | B2Pro2R | CACGCTGGACTGGGACTG       |
| 5  | B2Pro3F | GGTAGTGGGTTGGGACGAG      |
| 6  | B2Pro3R | ATGGCGTCATCTGGGACA       |
| 7  | B2Pro4F | CTAGCCACGCGTCACTGGT      |
| 8  | B2Pro4R | TCTGCAAAACAGAAGACCAAAA   |
| 9  | B2Pro5F | ACTGGCCCCTTGACTAGCAG     |
| 10 | B2Pro5R | GCCAGGCTGGTCTCAAACCT     |
| 11 | B2F-125 | TCTGAAACTAGGCGGCAGAG     |
| 12 | B2R32   | AATGTTGGCCTCTCTTTGGA     |
| 13 | B2F420  | TGAAAGTCCTGTTGTTCTAC     |
| 14 | B2R586  | TTGACCAAGACATATCAGGA     |
| 15 | B2F806  | CATCAGGGAATTCATTTAAAGT   |
| 16 | B2R848  | ATGTGGTCTTTGCAGCTATTTA   |
| 17 | B2F1178 | GAATGGTCTCAACTAACCCT     |
| 18 | B2F1561 | TCAGGTCATATGACTGATCC     |
| 19 | B2F1934 | GAAGCTGTTACAGAATGAT      |
| 20 | B2R2208 | TGCAGCCAAGACCTCTTCTT     |
| 21 | B2F2314 | ACTCCTACTTCCAAGGATGT     |
| 22 | B2R2365 | GCAGGCATGACAGAGAATCA     |
| 23 | B2F2689 | GAAAGGAATAATCTTGCTTTAG   |
| 24 | B2F3016 | GGAGGTAGCTTCAGAACAGC     |
| 25 | B2F3173 | AACTGAGCAAGCCTCAGTCAA    |
| 26 | B2F3398 | CAAGCTACATATTGCAGAAG     |
| 27 | B2R3548 | TCAAATTGCTTGCTGCTGTC     |
| 28 | B2F3785 | CAAGTAAATGTCATGATTCTGTTG |
| 29 | B2F4190 | AAGCATGTCATGGTAATACTTC   |
| 30 | B2R4382 | GGAAAAGTTATGCAATTCTTCTGG |
| 31 | B2R4528 | GTTGTCCCTGGAAGGTCACT     |
| 32 | B2F4600 | ATTGCAAAGGAATCTTTGGA     |
| 33 | B2R4840 | TAGGTGGCACCCACAGTCTCA    |
| 34 | B2F4985 | CAGTCATTGAAAATTCAGCCTTAG |
| 35 | B2R5202 | TTCGGAGAGATGATTTTTGTCAT  |
| 36 | B2F5391 | AAATGCATACCCACAAACTG     |
| 37 | B2R5534 | CTAAATGCAGGTGGCCCTAC     |

|    |                |                             |
|----|----------------|-----------------------------|
| 38 | B2F5741        | GCACGCATTACATAAGGTTT        |
| 39 | B2F5796        | TAACCAAAATATGTCTGGATTGGAG   |
| 40 | B2R5859        | TTCCAAACTAACATCACAAGGTG     |
| 41 | B2F5836        | TCACCTTGTGATGTTAGTTTGGGA    |
| 42 | B2F5925        | TGGGATTTTTAGCACAGCAA        |
| 43 | B2R5928        | CCCACAAGTATTTGCAGATGAG      |
| 44 | B2R5990        | CTTGCGTTTTGTAAATGAAGCA      |
| 45 | B2R6076        | TGAGCTGGTCTGAATGTTCTG       |
| 46 | B2F6193        | CAAGTTTCCATTTTAGAAAGTTCCT   |
| 47 | B2R6202        | TGGAAACTTGCTTTCCACTTG       |
| 48 | B2F6592        | GAAACTTTTTCTGATGTTCCCTGTGA  |
| 49 | B2R6496        | CCAAGTGTGTTTGTCTTGTTGA      |
| 50 | B2R6692        | GCAATTTCTACTGCTTCTGTTTCA    |
| 51 | B2R6932        | GGAGTGCTTTTTGAAGCCTTT       |
| 52 | B2F7000        | CCCTTTCGCACAACTAAGGA        |
| 53 | B2F7402        | GTAAGTTTCACAAAGTGTGAAGA     |
| 54 | B2F7810        | CTGTGTGACACTCCAGGTGT        |
| 55 | B2R8452        | CACAACCAACATTTCCCTCCA       |
| 56 | B2F8565        | GGAGGCCCAACAAAAGAGAC        |
| 57 | B2R8923        | CAATACGCAACTTCCACACG        |
| 58 | B2F8960        | TGAGTATTTGGCGTCCATCA        |
| 59 | B2F9362        | CTGCAAGCAACCTCCAGTG         |
| 60 | B2F9905        | GGAGTTGTGGCACCAATACGAAAC    |
| 61 | B2F10259       | CATTTGCAAAGGCGACAATA        |
| 62 | B2R10303       | CTGGAAAGGTTAAGCGTCAA        |
| 63 | B2F10396       | GTGTATCGGGCAAAAATCGT        |
| 64 | B2F10663       | TCTTTGGATTTGATCACTACAAGT    |
| 65 | B2R10797       | GCTAAACTAAAAGGAATTATCTGCATC |
| 66 | B2F10933       | CAATTCTTCATCCTTAAGTCAGCA    |
| 67 | B2F11129       | TTGCTTTCAAATTGGCACTG        |
| 68 | B2R11158       | CAGTGCCAATTTGAAAGCAA        |
| 69 | B2F.IVS10-237  | TACACCACCACACCCAGCTA        |
| 70 | B2F.IVS12-221  | TGCTGATTTCTGTTGTATGCTTG     |
| 71 | B2R.IVS13+278  | TGATTCGGAGCAATTTCCCTT       |
| 72 | B2F.IVS16-59   | TTGAATTCAGTATCATCCTATGTGG   |
| 73 | B2R.IVS17+135  | GAGAACAGCAGTGTGGGATG        |
| 74 | B2F.IVS18+1419 | CTCAGAGGCTTGTTGGGAAA        |
| 75 | B2R.IVS18+1769 | AGGCCAGGTACAGTGGTTCA        |
| 76 | B2F.IVS18+2497 | TGCCATGTTTTATAGATTTGTCTTT   |

|    |                |                          |
|----|----------------|--------------------------|
| 77 | B2R.IVS18+2914 | TCACATCTGCACCTTTCTCTG    |
| 78 | B2F.IVS19-174  | GGGGTTTCATCATGTTGGTC     |
| 79 | B2R.IVS20+179  | TGTCCCTTGTTGCTATTCTTTG   |
| 80 | B2F.IVS20-1695 | GGGAGGCCTCAGGAACTTA      |
| 81 | B2R.IVS20-1271 | TGATTCCAACCCTCATGGAT     |
| 82 | B2R.IVS21-206  | GGAGGATCATTTTTGCCGTA     |
| 83 | B2F.IVS24+127  | GCCTCTTTGAACCTCTGATTTT   |
| 84 | B2R.IVS24+551  | CGGTGGCGGGTATATGTAGT     |
| 85 | B2F.IVS25-492  | CCAGTTGTGATTTCTCAAGCA    |
| 86 | B2R.IVS25-76   | AAAGCAGAAATGAAAAGTTTGGGA |

**Table S5. Primers used for *BRCA1* sequencing and PCR.**

| #  | Primer  | Seq 5' to 3'          |
|----|---------|-----------------------|
| 1  | B1F3    | CTCGCTGAGACTTCCTGGAC  |
| 2  | B1R418  | TCCAAACCTGTGTCAAGCTG  |
| 3  | B1F878  | AGCTGAGAGGCATCCAGAAA  |
| 4  | B1R972  | GCTGTAATGAGCTGGCATGA  |
| 5  | B1F1311 | TCACATGATGGGGAGTCTGA  |
| 6  | B1F1641 | CCTACATCAGGCCTTCATCC  |
| 7  | B1R2114 | GTTTCTGCTGTGCCTGACTG  |
| 8  | B1F2095 | CAGTCAGGCACAGCAGAAAC  |
| 9  | B1F2280 | TTTGTCAATCCTAGCCTTCCA |
| 10 | B1F2494 | GGAAGGCAAAAACAGAACCA  |
| 11 | B1R2504 | TTTTGCCTTCCCTAGAGTGC  |
| 12 | B1F2717 | CCAGTCATTTGCTCCGTTTT  |
| 13 | B1R2743 | GGATTTGAAAACGGAGCAAA  |
| 14 | B1R2921 | CTGACCAACCACAGGAAAGC  |
| 15 | B1F2997 | GGCAACGAAACTGGACTCAT  |
| 16 | B1R3247 | TTGCTTGAGCTGGCTTCTTT  |
| 17 | B1R3361 | TTCAATTTTGGCCCTCTGTT  |
| 18 | B1F3524 | GCCTATGGGAAGTAGTCATGC |
| 19 | B1F3653 | CAAAGCGTCCAGAAAGGAG   |
| 20 | B1R3876 | ACAGACACTCGGTAGCAACG  |
| 21 | B1F4100 | GTCTGAAAGCCAGGGAGTTG  |
| 22 | B1F4305 | CAGAGGGATACCATGCAACA  |
| 23 | B1F4530 | GGCCTTTCTGCTGACAAGTT  |
| 24 | B1F5120 | GTTTGCCAGAAAACACCACA  |
| 25 | B1R5668 | AGCTCCTGGCACTGGTAGAG  |

|    |               |                             |
|----|---------------|-----------------------------|
| 26 | B1F101-378    | ATTGGTGTTGGTTTGGTCGT        |
| 27 | B1F101-159    | TCTTTAAAAATAAAGGACGTTGTCA   |
| 28 | B1R199+143    | TTCAGTTAAGAAAATCAGCAATTACA  |
| 29 | B1R199+451    | TCTCGATCTCCTGACCTCGT        |
| 30 | B1F200-352    | GATGAGATGTGCACCCACAG        |
| 31 | B1F200-206    | GCTCACTGAAGGTAAGGATCG       |
| 32 | B1R253+190    | TTACCAGGA ACTATGATTACAACCAA |
| 33 | B1R253+451    | AGGTGGATCACAAGGTCAGG        |
| 34 | B1F.IVS10-294 | CTGATGGCCAATCTGCTTTT        |
| 35 | B1R.IVS11+33  | ACTGGGGCAAACACAAAAAC        |
| 36 | B1F.IVS15-47  | TTCAACATTCATCGTTGTGTAAA     |
| 37 | B1R.IVS16+1   | CAAATTCTTCTGGGGTCAGG        |
